# Supplementary material for: Photosensitizing properties of hollow microcapsules built by multilayer self-assembly of poly(allylamine hydrochloride) modified with rose Bengal
Source: Royal Society of Chemistry journal article supplement (doi:10.1039/c9ra03153g), 2019-01-01
Supplement: c9ra03153g1.pdf [file c9ra03153g1.pdf]

# Electronic Supplementary Information

## (ESI)

### **Photosensitizing properties of hollow microcapsules built by multilayer self-assembly of poly(allylamine hydrochloride) modified with rose Bengal**

*Mariana P. Serrano<sup>\*1</sup>, Matías Rafti<sup>1</sup>, Andrés H. Thomas<sup>1</sup> and Claudio D. Borsarelli<sup>2</sup>*

1 Instituto de Investigaciones Fisicoquímicas Teóricas y Aplicadas (INIFTA),  
Departamento de Química, Facultad de Ciencias Exactas, Universidad Nacional de La Plata,  
CCT La Plata-CONICET, La Plata, Argentina

2 Instituto de Bionanotecnología del NOA (INBIONATEC), CONICET. Universidad  
Nacional de Santiago del Estero (UNSE), RN9, Km 1125, G4206XCP Santiago del Estero,  
Argentina.

\* Corresponding author email: [mariserr@inifta.unlp.edu.ar](mailto:mariserr@inifta.unlp.edu.ar)

### **Synthesis of PAH-RB polycation**

3 mM of 1-ethyl-3-(3-dimethylamino-propyl) carbodiimide (EDC), solution was added to a Rose Bengal (RB) buffered 2-(4-morpholino)-ethane sulfonic acid (MES) (10 mM, pH 6.0) solution (30  $\mu$ M, 10 mL) and stirred evenly. Then, 0.4 mM of N-hydroxysulfo succinimide sodium salt (sulfo-NHS) solution was added and stirred for 30 minutes in order to achieve carboxyl activation. Finally, 20 mL of poly(allylamine hydrochloride) (PAH) (7.5 mg/mL) in buffer HEPES solution (50 mM, pH 7.2) was added and stirred for 15 h. The product was purified by dialysis during 48 h with 12 KDa MW (molecular weight cut-off). The whole reaction and dialysis process were protected from light.

### **Hollow microcapsule preparation**

1 mL of 0.25 M  $\text{CaCl}_2$  ultra-pure deionized water solution was placed in 2 mL Eppendorfs and kept at 25  $^{\circ}\text{C}$  under 800 rpm orbital shaking. Afterwards, 500  $\mu$ L of 0.5 M  $\text{Na}_2\text{CO}_3$  aqueous solution were added and stirred for 30 s. Immediately, the suspension was centrifuged at  $1500\times g$  during 60 s and three-times washed with water, followed by a final wash with pure ethanol. The centrifuged pellet was dried at 35  $^{\circ}\text{C}$  overnight, and the powder was stored in dry ambient until further use.

Polymeric microcapsules were built using  $\text{CaCO}_3$  templates sequentially coated with oppositely charged polyelectrolyte layers (LbL assembly) Briefly; i) 30 mg of  $\text{CaCO}_3$  microparticles were suspended with 1 mL of PEI (1 mg/mL) solution and placed in an ultrasonic bath for 60 s until complete dispersion; ii) the suspension was placed in the mixer during 15 min at 25  $^{\circ}\text{C}$  with shaking at 1100 rpm; and finally iii) the suspension was centrifuged at  $1500\times g$  for 60 s, the supernatant removed and the pellets re-suspended with 1 mL of 50 mM NaCl solution.

The washing cycle was repeated twice. Afterwards, PEI coated microparticles were suspended with 1 mL of PSS solution (1 mg/mL) and steps i) to iii) were repeated. The next layer was placed by adsorbing PAH-RB (1mg/ml) using the same protocol. The multilayers were formed by alternating adsorption until reaching the desired number of bilayers of anionic and cationic polyelectrolytes for the microparticles. UV-vis spectra were recorded for the supernatant after each polyelectrolyte addition (PSS or PAH-RB) in order to follow the formation of subsequent layers. For the described procedure, approximately 70% of the PAH-RB remains surface-adsorbed, and such adsorption efficiency was maintained throughout the successive layer depositions (Figure S1).

Removal of CaCO<sub>3</sub> template was carried by re-suspension of the coated microparticles with 0.1 M EDTA solution at pH 7 during 30 min at 25 °C while shaking at 1100 rpm. The ions resulting from CaCO<sub>3</sub> dissolved template were separated by centrifugation at 6000×g for 15 minutes and then the supernatant removed. The described EDTA treatment was repeated two-times to ensure complete removal of CaCO<sub>3</sub>. A final wash was performed using 50 mM NaCl solution to remove the remaining EDTA (Scheme 1). Finally, the obtained HM were stored at 8°C before use.

**Additional experiments on HM assembly, quenching of the triplet excited state of PAH-RB, and dGMP consumption as detected via HPLC.**

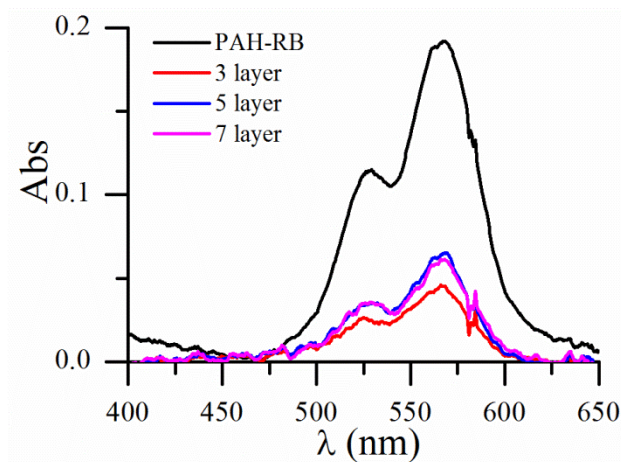

**Figure S1.** UV-vis spectra of PAH-RB registered for the supernatant after each successive addition of PAH-RB layer during multilayer self-assembly process.

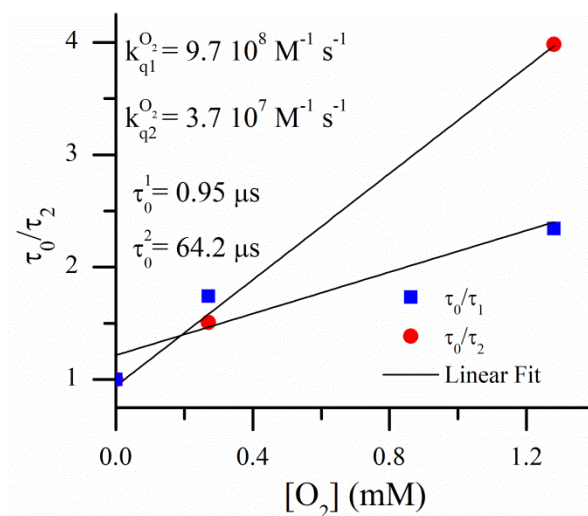

**Figure S2.** Stern–Volmer plot of the quenching of the triplet excited state of PAH-RB in hollow microcapsules by dissolved  $O_2$ . The triplet lifetime values were calculated analyzing the transient decay at 560 nm.

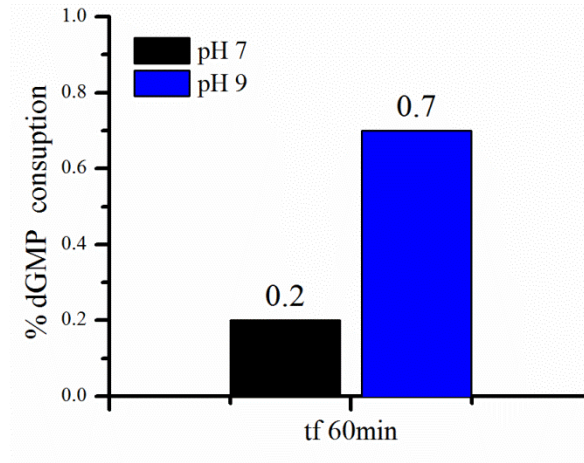

**Figure S3.** Comparison of dGMP consumption in aqueous suspension of hollow microcapsules after 60 minutes of irradiation time in neutral and alkaline media.  $[dGMP]_0 = 80 \mu M$ ,  $\lambda_{irr} = 567 \text{ nm}$ .
